# Supplementary material for: Copolythiophene-based water-gated organic field-effect transistors for biosensing
Source: Royal Society of Chemistry journal article supplement (doi:10.1039/c3tb00525a), 2013-01-01
Supplement: c3tb00525a.pdf [file c3tb00525a.pdf]

Electronic Supplementary Information (ESI) available: FT-IR and  $^1\text{H}$  NMR of P3HT-biotin.

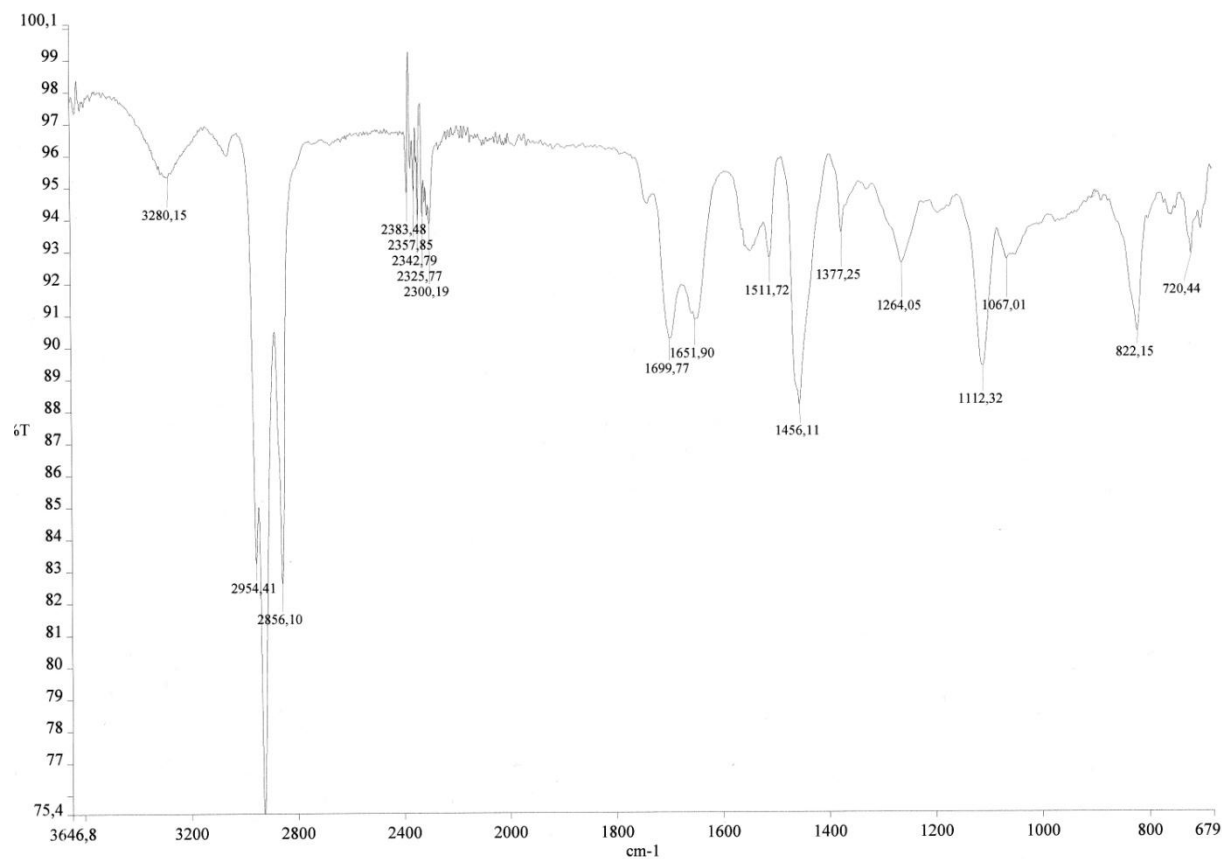

FT-IR spectrum of P3HT-biotin.

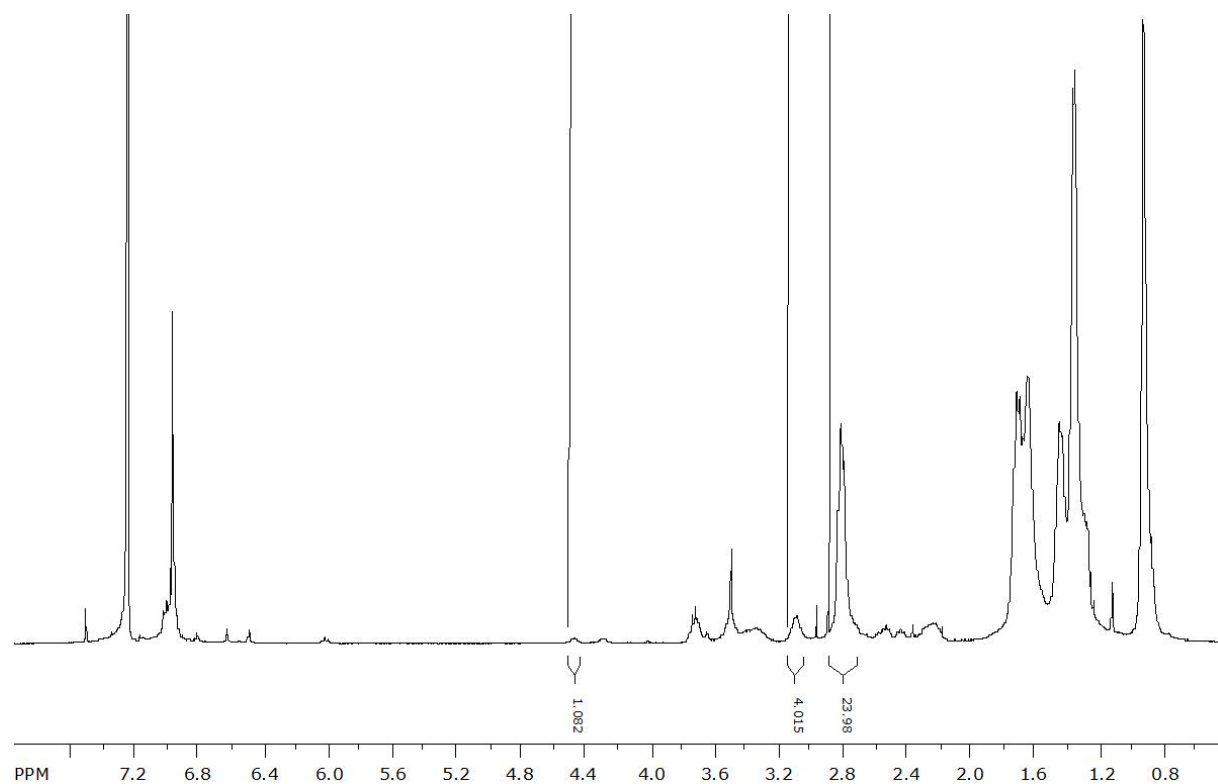

Figure 2:  $^1\text{H}$  NMR spectrum of P3HT-biotin
